# Supplementary material
Source: PubMed Central journal article supplement (PMC7335777)
Supplement: supp_RA119.011811_156989_2_supp_524452_q9trwn.pdf [file supp_RA119.011811_156989_2_supp_524452_q9trwn.pdf]

## Supplementary Information

**Crystal structures of the RNA triphosphatase from *Trypanosoma cruzi* provide insights into how it recognizes the 5' end of the RNA substrate.**

Yuko Takagi<sup>1</sup>, Naoyuki Kuwabara<sup>2</sup>, Truong Tat Dang<sup>3</sup>,  
Koji Furukawa<sup>1</sup> and C. Kiong Ho<sup>3</sup>

From the <sup>1</sup>Biomedical Research Institute, National Institute of Advanced Industrial Science and Technology (AIST), Tsukuba, Ibaraki, Japan;  
the <sup>2</sup>Structural Biology Research Center, Institute of Materials Structure Science, High Energy Accelerator Research Organization (KEK) Ibaraki, Japan;  
the <sup>3</sup>Faculty of Medicine, University of Tsukuba, Tsukuba, Ibaraki, Japan

**Table S1**Data collections and refinement statistics of the *Trypanosoma cruzi* RNA Triphosphatase, TcCet1(18-243  $\Delta$ 55-75) , crystals

| Ligand(s)<br>PDB ID          | Mn <sup>2+</sup> , PPPi and I <sup>-</sup><br>6L7V | Mn <sup>2+</sup><br>6L7W            | Compound #951<br>6L7X      | Compound #466<br>6L7Y      |
|------------------------------|----------------------------------------------------|-------------------------------------|----------------------------|----------------------------|
| <b>Data Collection</b>       |                                                    |                                     |                            |                            |
| Beamline                     | Photon Factory, BL1A                               | NSRRC, BL15A                        | Photon Factory, BL1A       | Photon Factory, BL1A       |
| Wavelength (Å)               | 1.9000                                             | 1.0000                              | 1.1000                     | 1.1000                     |
| Resolution range             | 33.63 - 2.20 (2.28 - 2.2)                          | 47.9 - 2.60 (2.72 - 2.60)           | 49.65 - 2.39 (2.48 - 2.39) | 49.40 - 2.51 (2.61 - 2.51) |
| Space group                  | <i>P3<sub>2</sub>21</i>                            | <i>P2<sub>1</sub></i>               | <i>P3<sub>2</sub>21</i>    | <i>P3<sub>2</sub>21</i>    |
| Unit cell a,b,c              | 67.3, 67.3, 76.8                                   | 52.4, 73.2, 63.7<br>$\beta = 114.1$ | 114.7, 114.7, 56.7         | 115.9, 115.9, 56.7         |
| Total reflections            | 409654                                             | 51598                               | 176432                     | 147972                     |
| Unique reflections           | 10613                                              | 13646                               | 17288                      | 15320                      |
| Multiplicity                 | 38.6                                               | 3.8                                 | 10.2                       | 9.7                        |
| Completeness (%)             | 100.0 (99.7)                                       | 99.6 (98.7)                         | 100.0 (100.0)              | 99.7 (98.2)                |
| Mean I/sigma( $\sigma$ )     | 33.5 (0.7)                                         | 9.9 (1.7)                           | 14.9 (1.7)                 | 16.6 (1.8)                 |
| Wilson B-factor              | 39.4                                               | 40.1                                | 45.1                       | 57.2                       |
| R-merge                      | 0.095 (5.854)                                      | 0.121 (0.860)                       | 0.101 (1.843)              | 0.083 (1.208)              |
| R-meas                       | 0.096 (5.939)                                      | 0.142 (1.054)                       | 0.106 (1.934)              | 0.087 (1.273)              |
| CC1/2                        | 1.000 (0.955)                                      | 0.996 (0.709)                       | 0.999 (0.771)              | 0.999 (0.927)              |
| <b>Phasing</b>               |                                                    |                                     |                            |                            |
| Number of sites              | 7                                                  | -                                   | -                          | -                          |
| Figure of merit              | 0.327                                              | -                                   | -                          | -                          |
| <b>Refinement</b>            |                                                    |                                     |                            |                            |
| R-work                       | 22.6                                               | 23.9                                | 20.4                       | 20.1                       |
| R-free                       | 26.1                                               | 29.4                                | 23.8                       | 24.0                       |
| Number of non-hydrogen atoms | 1449                                               | 2893                                | 1675                       | 1657                       |
| macromolecules               | 1402                                               | 2850                                | 1612                       | 1613                       |
| ligands                      | 21                                                 | 2                                   | 36                         | 36                         |
| solvent                      | 26                                                 | 41                                  | 27                         | 8                          |
| Protein residues             | 180                                                | 362                                 | 203                        | 203                        |
| RMS(bonds)                   | 0.004                                              | 0.005                               | 0.004                      | 0.004                      |
| RMS(angles)                  | 0.97                                               | 0.98                                | 0.95                       | 0.99                       |
| Ramachandran favored (%)     | 95.9                                               | 97.7                                | 98.0                       | 97.5                       |
| Ramachandran allowed (%)     | 4.1                                                | 2.3                                 | 2.0                        | 2.5                        |
| Ramachandran outliers (%)    | 0.0                                                | 0.0                                 | 0.0                        | 0.0                        |
| Rotamer outliers (%)         | 3.4                                                | 1.3                                 | 1.2                        | 0.6                        |
| Average B-factor             | 61.2                                               | 56.0                                | 67.0                       | 67.6                       |
| macromolecules               | 60.3                                               | 56.2                                | 66.8                       | 66.8                       |
| ligands                      | 133.5                                              | 53.5                                | 98.8                       | 101.7                      |
| Mn annd PPPi                 | 97.6                                               | -                                   | -                          | -                          |
| iodine                       | 205.2                                              | -                                   | -                          | -                          |
| solvent                      | 49.4                                               | 43.6                                | 56.5                       | 74.8                       |

\*Highest resolution shells are shown in parenthesis

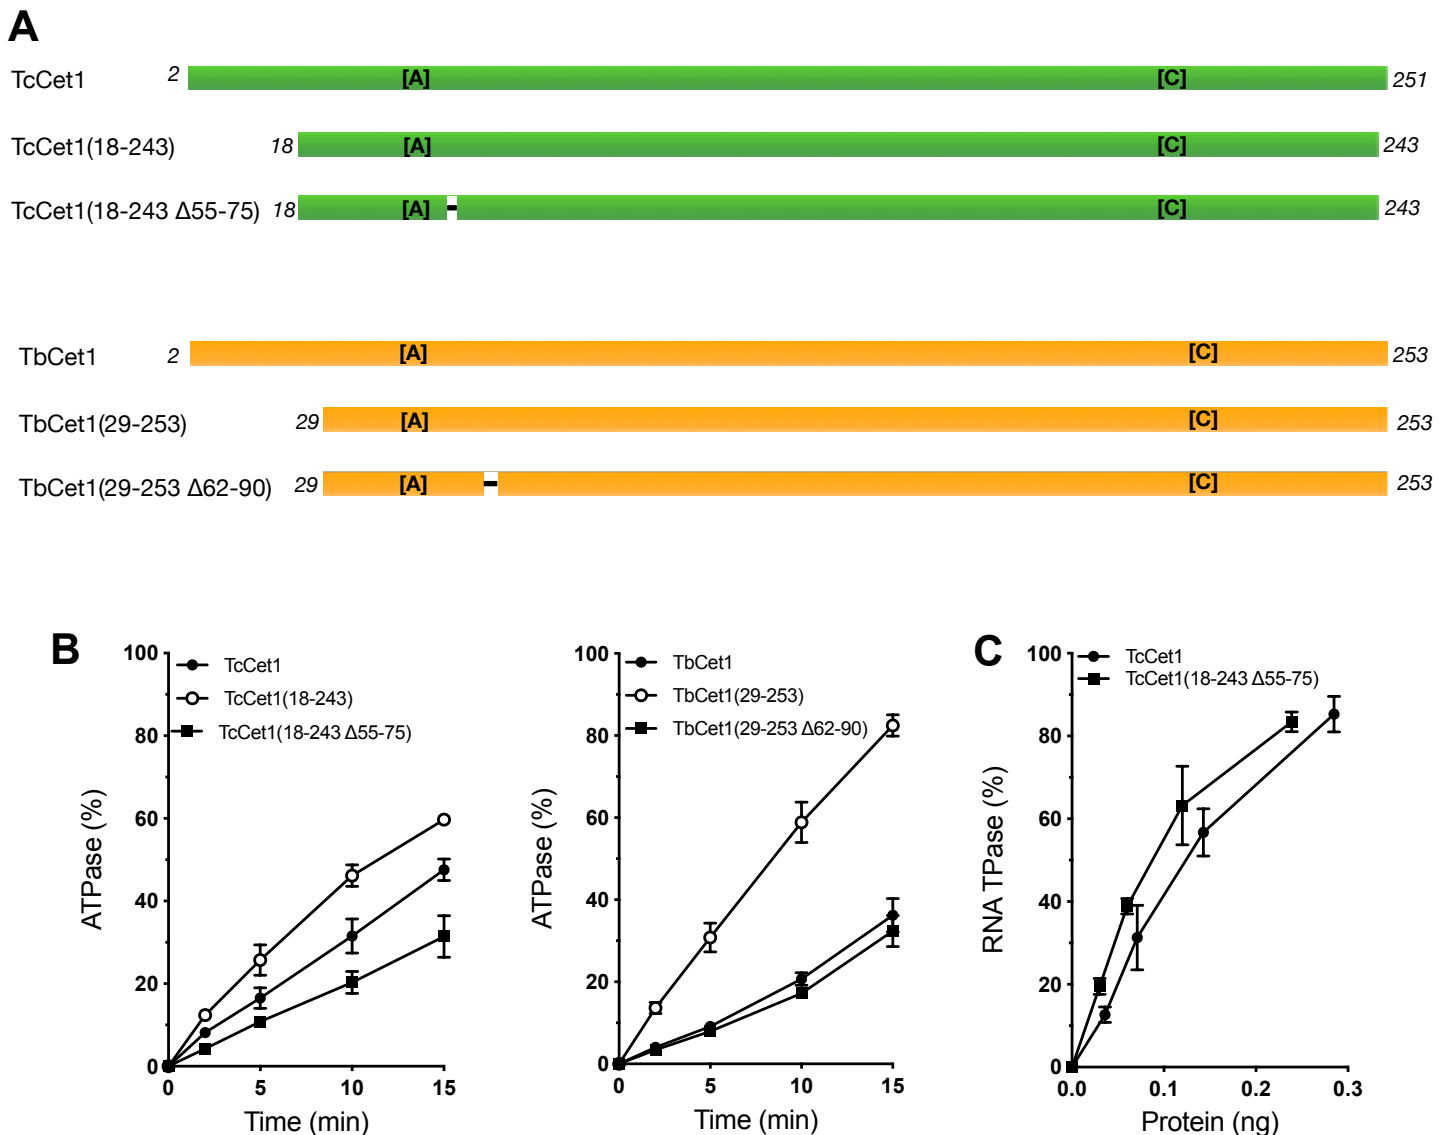

**Figure S1.** Deletion analysis of *Trypanosoma* RNA triphosphatase. (A) Schematic diagram of full-length TcCet1, TcCet1(18-243), TcCet1(18-243 Δ55-75), TbCet1, TbCet1(29-253) and TbCet1(29-253 Δ62-90) are shown. Internal deletion is indicated by a dash. Position of conserved motifs, A and C, are indicated. (B) ATPase activity. Reaction mixtures (50 μL) containing 50 mM Tris-HCl (pH 7.5), 2 mM DTT, 2 mM MnCl<sub>2</sub>, 0.2 mM [ $\gamma$ -<sup>32</sup>P]ATP, and 5 ng of full-length and truncated proteins were incubated at 30°C. Aliquots were withdrawn at the indicated time and Pi release was plotted as a function of time. (C) RNA triphosphatase activity of TcCet1 and TcCet1(18-243 Δ55-75). Reaction mixtures (10 μL) containing 50 mM Tris-HCl, pH 7.5, 2 mM DTT, 2 mM MgCl<sub>2</sub>, 1 μM [ $\gamma$ -<sup>32</sup>P]pppRNA, and indicated amount of full-length TcCet1 and TcCet1(18-243 Δ55-75) were incubated at 30°C for 15 min. Pi release was plotted as a function of input protein. The data shown represent the average of three separate experiments with SE bars.

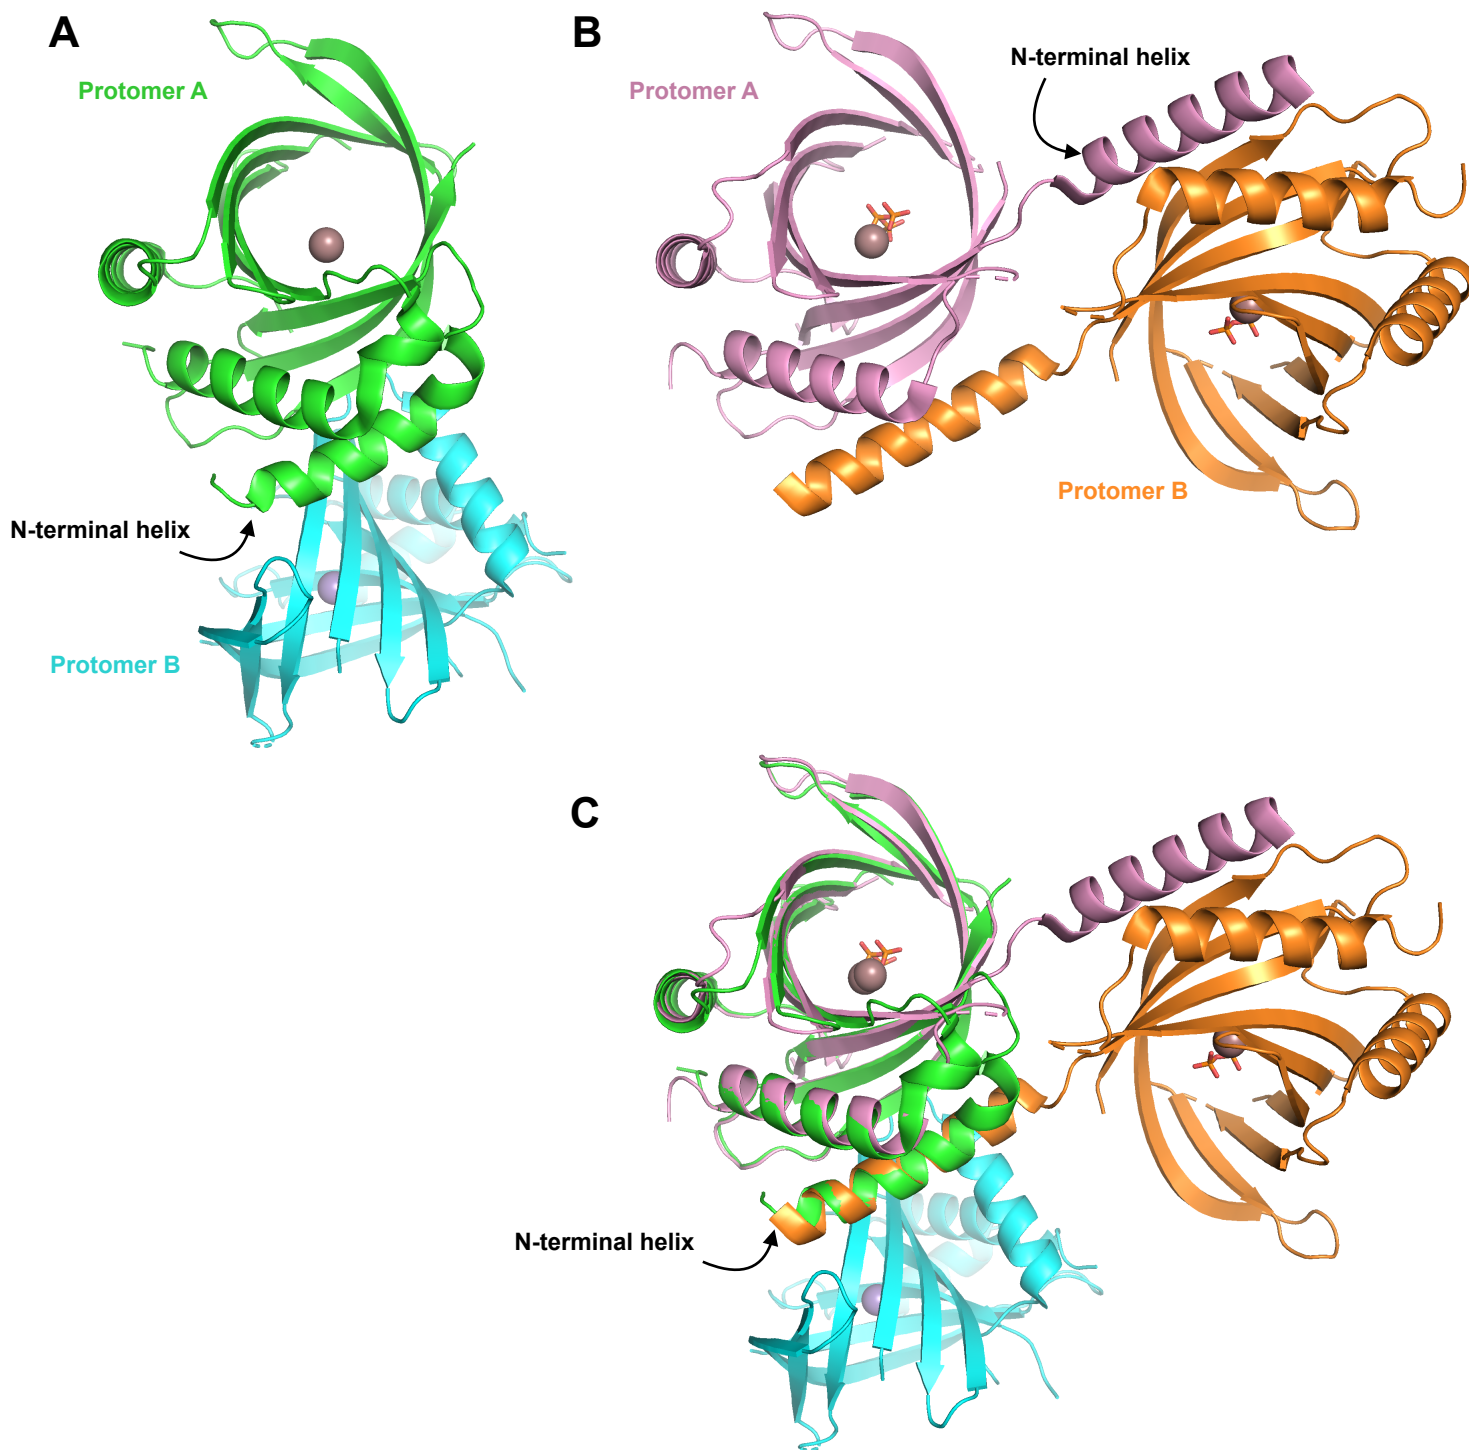

**Figure S2.** Crystal structures of TcCet1(18-243  $\Delta$ 55-75). (A) Mn-bound structure. Ordered amino acids in protomer A/B include 18–50, 79-165, 178-218, 220-242/ 20-51, 79-114, 116-164, 180-215, 219-242. (B) Mn•PPPi-bound structure. The ordered amino acids include 18–51, 77-112, 117-164, 179–217, 220–242. (C) Superimposition of Mn-bound and Mn•PPPi-bound structure of TcCet1(18-243  $\Delta$ 55-75). Note that position of N-terminal helix (amino acid residues 19-36) in the protomer A of the Mn-bound form (green) and protomer B of the Mn•PPPi bound form (orange) overlap each other.

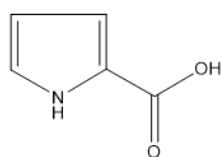

**Compound # 202**  
T<sub>m</sub> = 37.0°C

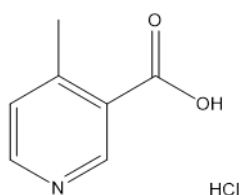

**Compound # 212**  
T<sub>m</sub> = 33.6°C

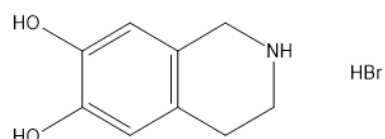

**Compound # 224**  
T<sub>m</sub> = 34.5°C

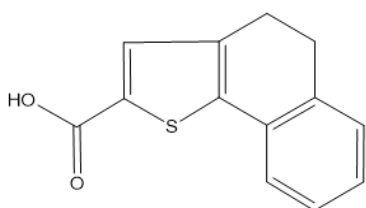

**Compound # 332**  
T<sub>m</sub> = 35.7°C

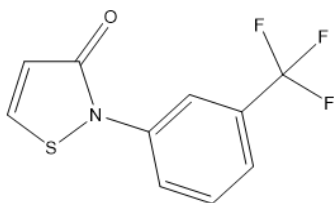

**Compound # 375**  
T<sub>m</sub> = 36.0°C

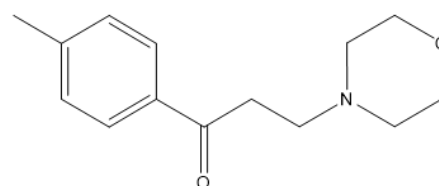

**Compound # 378**  
T<sub>m</sub> = 36.9°C

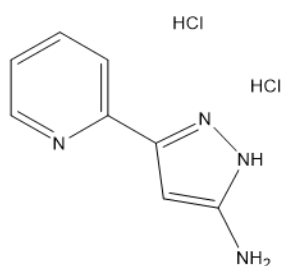

**Compound # 521**  
T<sub>m</sub> = 35.8°C

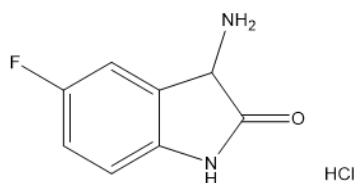

**Compound # 524**  
T<sub>m</sub> = 35.8°C

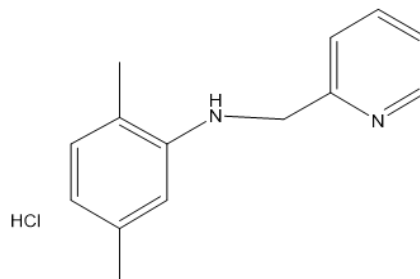

**Compound # 809**  
T<sub>m</sub> = 33.0°C

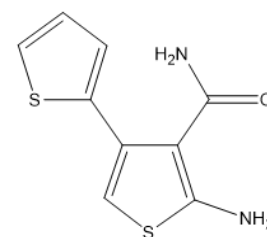

**Compound # 818**  
T<sub>m</sub> = 36.2°C

**Figure S3.** Small molecules that destabilize TcCet1. Melting temperature (T<sub>m</sub>) of TcCet1(18-243 Δ55-75) in the presence of 2 mM compounds were determined by thermal shift assay (Figure 3A). Structures of ten compounds that reduce the T<sub>m</sub> to below 37°C are shown.

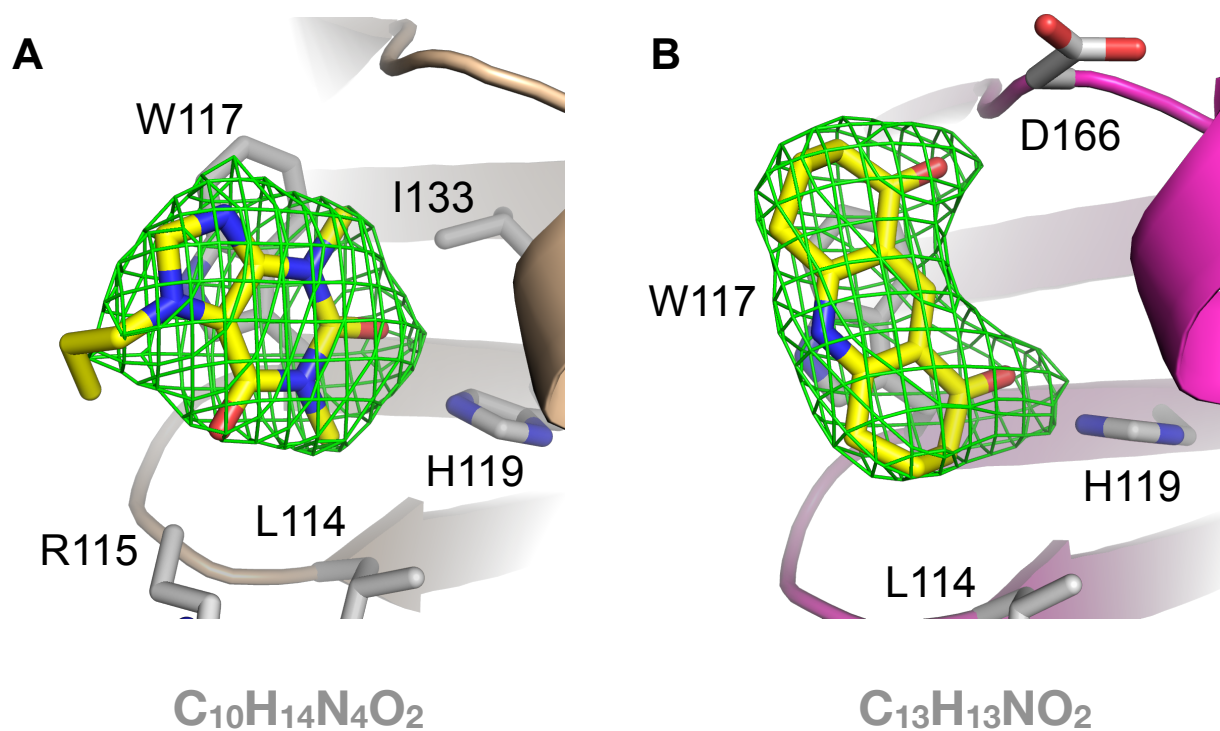

**Figure S4.** Electron-density of ligands bound to TcCet1(18-243  $\Delta$ 55-75). Omit ( $F_o-F_c$ ) map of (A)  $C_{10}H_{14}N_4O_2$ ; compound #951 and (B)  $C_{13}H_{13}NO_2$ ; compound #466. Omit maps are shown as green mesh, contoured at  $3\sigma$ . Maps are carved at  $2.0\text{ \AA}$  around the ligands. Proteins are shown in cartoon representations and ligands as sticks colored according to the atom type (nitrogen in blue, oxygen in red and carbon in yellow).

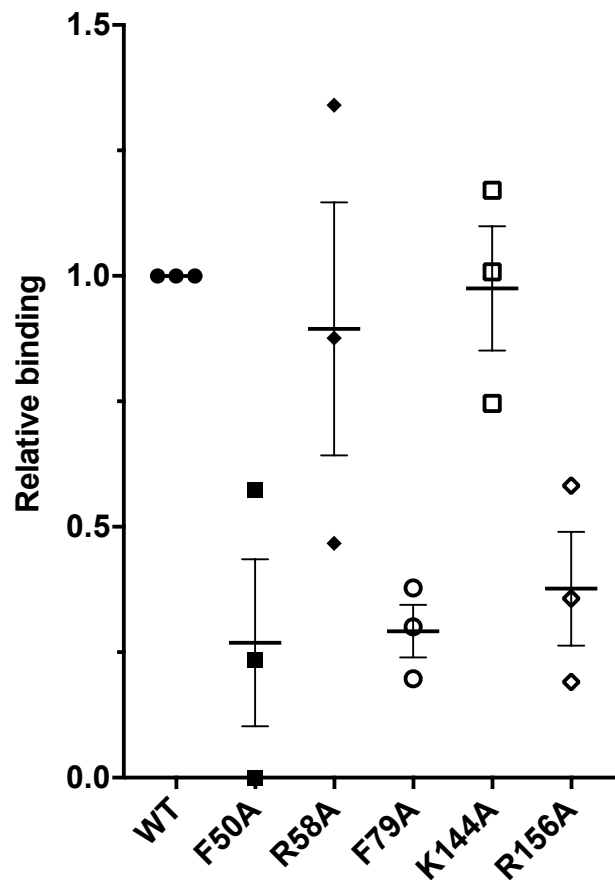

**Figure S5.** Filter binding Assay. Nucleic acid binding of wild type and mutant TcCet1 proteins were analyzed by filter binding assay. One pmol of 5' [<sup>32</sup>P]-labeled 17-mer oligonucleotide was incubated with 10 pmol of protein in a 20  $\mu$ L buffer containing 50 mM Tris-HCl (pH 7.5), 2 mM DTT and 50 mM NaCl for 15 min at 23°C. The mixture was then spotted onto MF-Millipore membrane filter (Merck), and washed twice with the buffer. The dried membrane was exposed to a PhosphorImager plate, scanned by BAS-2000, and quantitated by Image Gauge software. The amount of labeled oligonucleotide bound by the WT was defined as an arbitrary unit of 1.0, against which all other values were normalized. The average of three independent experiments and standard error of the mean are plotted.
